# Supplementary material for: Functional and Transcriptomic Characterization of Postnatal Maturation of ENS and SIP Syncytium in Mice Colon
Source: MDPI journal article supplement (doi:10.3390/biom13121688), 2023-11-23

## Supplementary Material

**Table S1.** Primers used for qRT-PCR assay.

| Primer            | Primer sequences (5' → 3') |
|-------------------|----------------------------|
| <i>Scn7a</i> -F   | TGAAGCTGTTTGGTCGAAG        |
| <i>Scn7a</i> -R   | TCGGAACACGGTCATGTA         |
| <i>Kcna1</i> -F   | AAGGGCTCCCGTAGTGTT         |
| <i>Kcna1</i> -R   | ACGCTGTCCTCTCTCTGG         |
| <i>Gfap</i> -F    | AGCGTGCAGAGATGATGG         |
| <i>Gfap</i> -R    | AGTTTGGTGGGCTCCTTG         |
| <i>Pdgfrα</i> -F  | ATGACAGCAGGCAGGGCTTCAACG   |
| <i>Pdgfrα</i> -R  | CGGCACAGGTCACCACGATCGTTT   |
| <i>c-Kit</i> -F   | CGCCTGCCGAAATGTATGACG      |
| <i>c-Kit</i> -R   | GGTTCTCTGGGTTGGGGTTGC      |
| <i>Nos1</i> -F    | ATCTGTCTCGCCAGCCATCAGCCA   |
| <i>Nos1</i> -R    | GGAGCTTTGTGCAGTTTGCCGTCG   |
| <i>P2ry1</i> -F   | ACCGAGGTGCCTTGGTCGGT       |
| <i>P2ry1</i> -R   | CCGGTCTTGGTCAGGGCACA       |
| <i>Slc18a3</i> -F | TCATGTTTCGCCTCCACAGTC      |
| <i>Slc18a3</i> -R | GCTCCTCGGGATACTTGTCG       |
| <i>Scn5a</i> -F   | GTTCGGCCACCTCACAG          |
| <i>Scn5a</i> -R   | AAAGGGTCCAGGTCTTCCA        |
| <i>Snap25</i> -F  | TCATCCGCAGGGTAACA          |
| <i>Snap25</i> -R  | GCGATTCTGGGTGTCAAT         |
| <i>Syn2</i> -F    | ATTCCCTGCGTGTGATAGA        |
| <i>Syn2</i> -R    | GGGGTGTGACTTGTTGAG         |
| <i>Syt1</i> -F    | CTTCTCCCTCCGCTACG          |
| <i>Syt1</i> -R    | TTCAGTCTCTTGCCGTTCT        |
| <i>Gapdh</i> -F   | GCCGATGCCCCCATGTTTGTGA     |
| <i>Gapdh</i> -R   | GGGTGGCAGTGATGGCATGGAC     |
| <i>Sox10</i> -F   | AACACATCGCTGCCCCTTTA       |
| <i>Sox10</i> -R   | GCAGGCAACCAGAAGCATTG       |
| <i>Ret</i> -F     | GCATGTCAGACCCGAAGTGG       |
| <i>Ret</i> -R     | CGCTGAGGGTGAAACCATCC       |
| <i>Phox2b</i> -F  | GCGAGAGTCCAGGTGTGGTT       |
| <i>Phox2b</i> -R  | CTCTTTGCTCTCGTCGTCCC       |
| <i>Chat</i> -F    | AAAATGGCGTCCAACGAGGA       |
| <i>Chat</i> -R    | CCCGGTTGGTGGAGTCTTTTA      |
| <i>S100b</i> -F   | CGAGAGGGTGACAAGCACAA       |
| <i>S100b</i> -R   | TCCTGCTCCTTGATTTCCTCCA     |

**Table S2.** All antibodies used for immunoblotting and immunohistochemistry.

| <b>Primary/secondary antibody</b> | <b>Catalog</b> | <b>Supplier</b>           | <b>Application (Work concentration)</b> |
|-----------------------------------|----------------|---------------------------|-----------------------------------------|
| Anti-GFAP                         | ab7260         | ABCAM                     | WB (1:5000)                             |
| Anti-PDGFR $\alpha$               | D1E1E XP       | Cell Signaling Technology | Wes (1:100)                             |
| Anti-c-Kit                        | AF1356         | R&D systems               | Wes (1:100)                             |
| Anti-ANO1                         | ab53212        | ABCAM                     | Wes (1:100)                             |
| Anti-NOS1                         | SC-5302        | Santa Cruz Biotechnology  | Wes (1:100)                             |
| Anti-P2RY1                        | ER1914-59      | HuaBio Technology         | WB (1:1000)                             |
| Anti-VACHT / SLC18A3              | ab235201       | ABCAM                     | WB (1:1000)                             |
| Anti-SK3                          | ab28631        | ABCAM                     | WB (1:5000)                             |
| Anti- $\gamma$ -ACTIN             | GTX101794      | Genetex                   | Wes (1:200)                             |
| Anti- $\beta$ -ACTIN              | ab8226         | ABCAM                     | WB (1:10000)                            |
| HRP-conjugated Anti-rabbit IgG    | AF008          | R&D systems               | Wes (1:1000), WB (1:5000)               |
| HRP-conjugated Anti-mouse IgG     | AF007          | R&D systems               | WB (1:5000)                             |

**Table S3.** All drugs used in isometric force recording and CMCs assay.

| <b>Drug</b> | <b>Catalog</b> | <b>Supplier</b> | <b>Application (Work concentration)</b> |
|-------------|----------------|-----------------|-----------------------------------------|
| LNNA        | No.0665        | Tocris          | IFR & CMCs (100.0 $\mu$ M)              |
| MRS2500     | No.2159        | Tocris          | IFR & CMCs (1.0 $\mu$ M)                |
| Atropine    | A-046          | Sigma-Aldrich   | IFR & CMCs (1.0 $\mu$ M)                |

## Supplementary Figure Legends

**Figure S1. The differentially expressed genes in the whole colon of young mice.** (A) The volcano plot of differentially expressed genes between PW1 and PW3 sample. (B) The volcano plot of differentially expressed genes between PW1 and PW5 sample. FC, fold change. The red and blue dots represent significantly up-regulated and down-regulated genes ( $\text{Log}_2(\text{FC}) \geq 1.0$  or  $\leq -1.0$ ,  $P < 0.05$ ).

**Figure S2. The gene ontology and pathway enrichment of differentially expressed genes.** (A), (B) and (C) The top ten biological processes, cellular components, and molecular function of differentially expressed genes in the colon of PW3 mice, respectively. (D) The top five enriched KEGG pathway of differentially expressed genes in the colon of PW3 mice. (E), (F) and (G) The top ten biological processes, cellular components, and molecular function of differentially expressed genes in the colon of PW3 mice, respectively. (H) The top five enriched KEGG pathway of differentially expressed genes in the colon of PW5 mice.

**Figure S3. The quantitative real time PCR results of representative genes in enteric neuron system.** Relative quantitative mRNA level of *Scn5a* (A), *Snap25* (B), *Syn2* (C), *Syt1* (D), *Sox10* (E), *Phox2b* (F), *Ret* (G), *Chat* (H) and *S100b* (I) in the whole colon of PW1, PW3, and PW5 mice. The box graphs shown in panels A-I represent mean  $\pm$  SD. Five samples were used for testing each transcript.

**Figure S4. The inhibitory effects of the P2Y1 receptor antagonist MRS2500 on CMC of the young murine colon.** A-C: Contractile responses of isolated proximal (P), middle (M), and distal colons (D) treated with MRS2500 (1.0  $\mu\text{M}$ ) from PW1 (A), PW3 (B), and PW5 (C) mice. D: The CMC frequency of each colon segment treated with MRS2500 from PW1, PW3 and PW5 mice. ND represents not determined. E: The CMC amplitude of each colon segment treated with MRS2500 from PW1, PW3, and PW5 mice. The bar graphs shown in panel D and E represent mean  $\pm$  SE ( $n = 6$ ). “n” means the number of animals. \* $P < 0.05$ .

Fig. S1

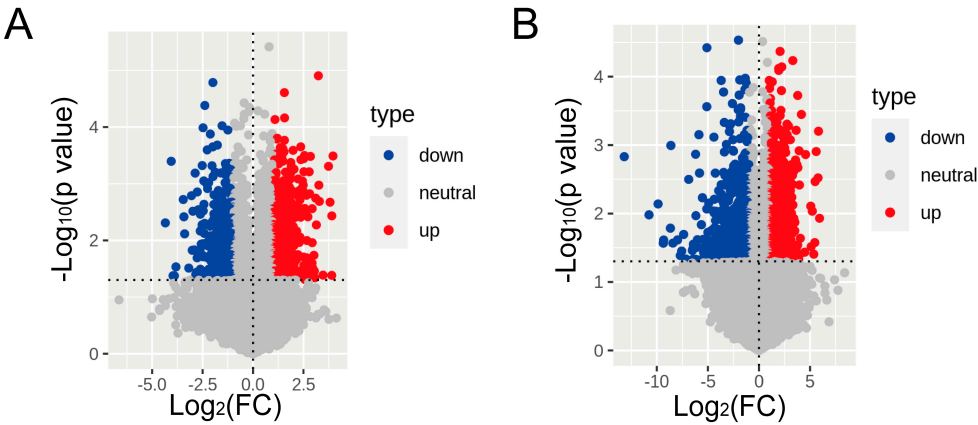

**Fig. S2**

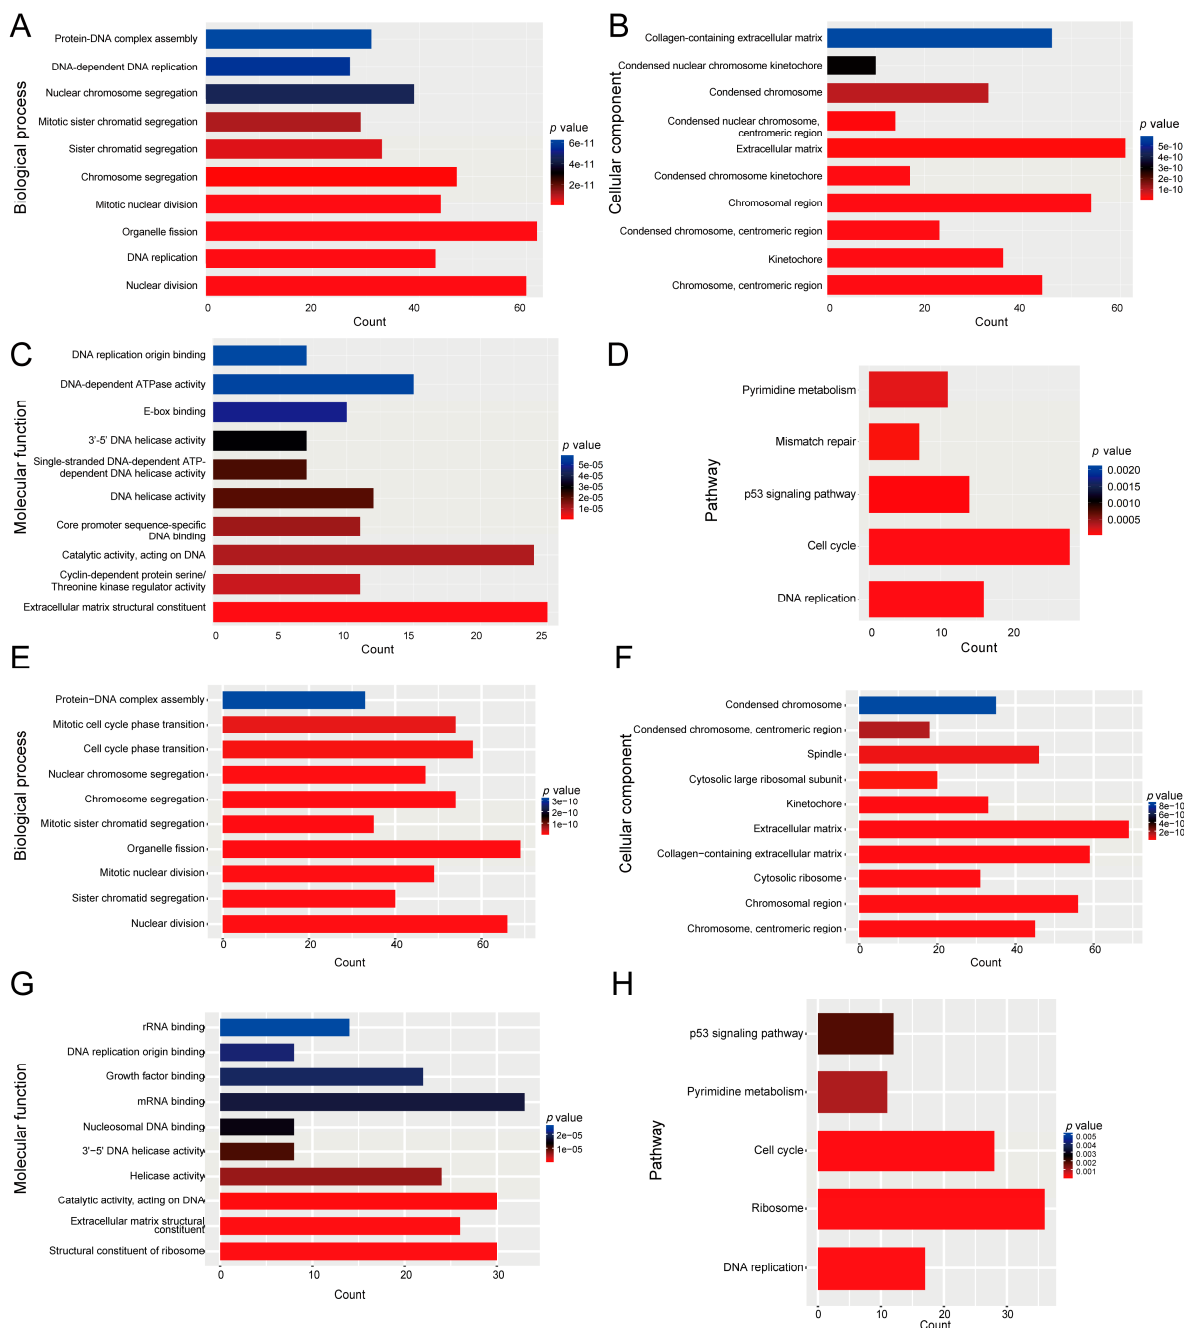

**Fig. S3**

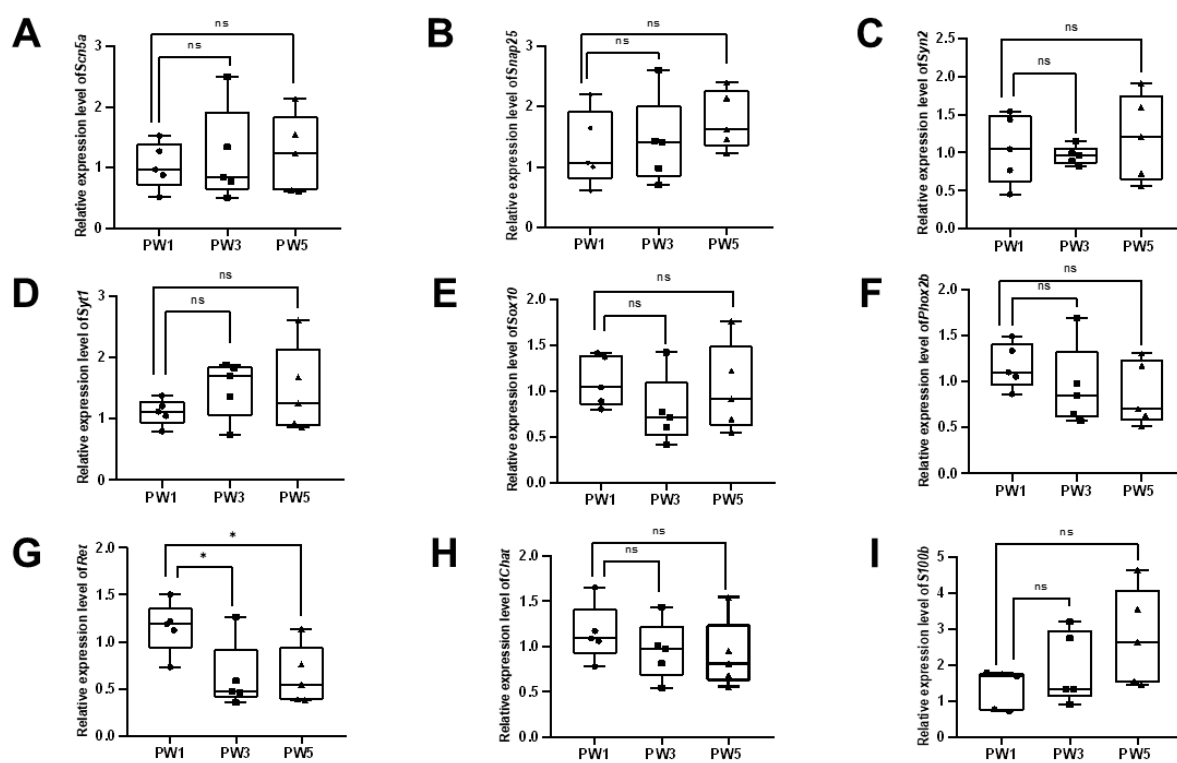

**Fig.S4**

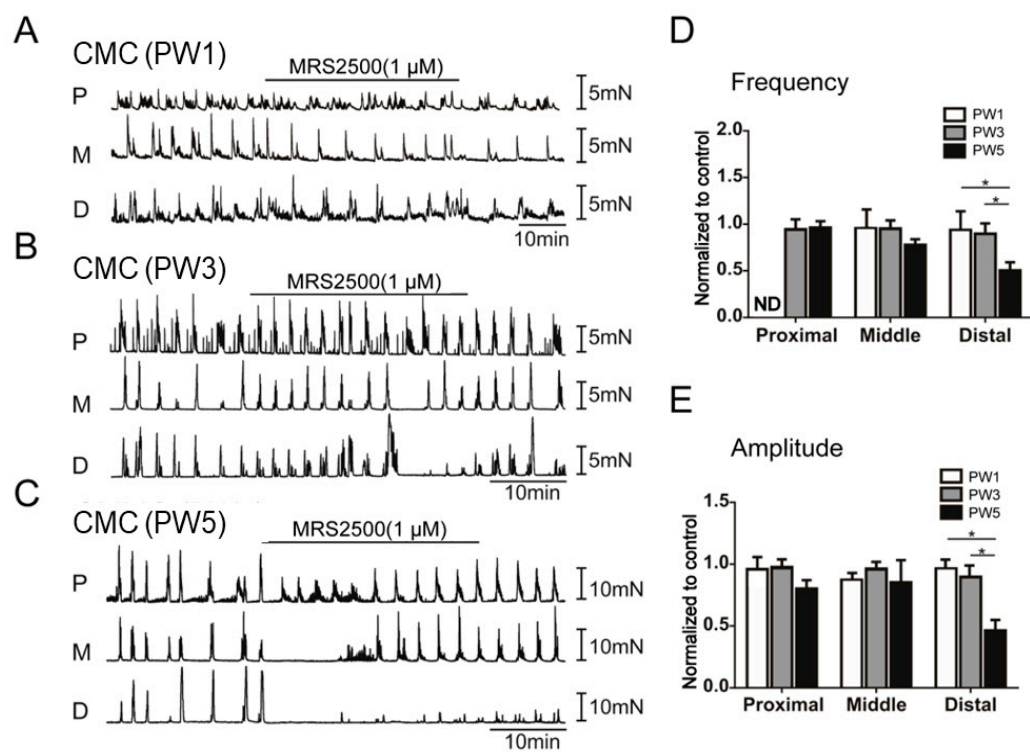

Supplement: s1 [file s1]
